1 ATGTTTGGTGGTGAATGTTATGCTTCAACAGTGATTGAAAGGAGCATGCGCAAACTGCTTTCC  
61 TCTCTCCCCAAATCTTTCTCACTGCATATTTCTTGAAGAAAGTACAGTTGGAGCTTCCG  
121 TTCCGGAAATAACCGACGAAAATGGCGCTACTCAACCCGCCAAAACACCATCGAT  
M A A T Q P R Q N Y H I D 13  
181 TGGCAAGCCCGCATCAACAAGCAGATCAACATGGAAGTATACGAGACTACGCTCTACAAC  
C E A R I N K Q I N M E L Y A S Y V Y T 33  
241 TCAATGGCTATTACTTTGACCGTGACGAGCTGGGCCCTGCGGGCTTCACAAAGTCTTTC  
S M A A Y Y F D R D D V C A L P G F H K F F 53  
301 AAGAAGACGACGAGGAGGAGCGTGACGAGCTGCAAGCTGATGAAGTACCGAAGCATG  
K K S S E E E R E H A A K L M K Y Q N M 73  
361 CGCGGGGCGCGGTGGTCTGCAGCCATCGAGAAGCCGCCAGGACGAGTGGGGCTCG  
R G G R V V L Q P I Q K P A Q D E W G S 93  
421 GGCCTGGACCGCATGCGGCCCTCCCTGGAGCTCGAGAAGTCCGTCACCCAGTGGCTGCTG  
G L D A M Q A S L E L E E K S V N Q S L L 113  
481 GACTTGCACAAGCTGGCCACGACCAACAGATGCCAGCTGTGCGACTTCTCTGGAGAC  
D L H K L A T D H N D A Q L C D F L E S 133  
541 GAGTACTTGGAGGAGCAGTGAAGGCCATCAAGGAGTCTCGACTACGTGAACCACTG  
E Y L E E Q V K A I K E L S D Y V T N L 153  
601 AAGCGTGTGGGGCCCGCTGGCGAGTACATGTTGCACAAGGAGACCTCGGAGGAGAC  
K R V G P G L G E Y M F D K E T L G G D 173  
661 GACTGAGGAGGAGGAGGAGTGGAGGCGCTGTTTGTGGATGCAAGGCCCGCACTCGT  
D \* 174  
721 TGTGTGCTATCTGTAAATTGGCCCCCATCCGACTCCACACCGGAGAACATAAAAAT  
781 ATGCTGAAGAGGGGAAAAAAAAAAAAAAAAAAAAA

1 ACTGAGCCGAGTGGTCCGCGGCGCTCTGACAGCAGCAACCACTTCGCGATCTGATCTTCGGCTTTGGCTGCTCTGGTGGCTCTG 16  
1 91 CGAGGGAGCAACCTGAAGCGCAAGTGAACCCAGACAGTATTTCTGCGACGAGTCCGGCTTTGGCTGCGAGAGCAGATCAACCG 16  
1 A G N N L N E Q V N Q N K Y F L H D R C R L G L Q E Q I N A 46  
181 GAGCTTCAAGCAAGCTTGGTCTATCATGCAGATGGCGGCTACTCTGGCAACAACAAGGTGGCGGCTGGGGCTTGGCTGCTCTTTCAGC 76  
1 E L H A S L V Y M Q M A A Y L G N N K K V A R A G F A R F F S 76  
271 GACGACTCAAGTCGAGGACCGGAGCGACGACGAGAGCTGGTGGACTACGTGAACCTTCGGCGGGCGACGCTGAGCAACCTGAATTGGAC 106  
1 D Q S S E E R E H A Q K L V D Y V N L R G G T S S N V N V D 106  
361 ATGCGCGGACGGCGGACCTGAGTGGAGTCTGCGACAGCTGCGGCTGGCGCTGGCGCTGAGGACGAGTGCACCAACCGGCTGCGCGA 136  
1 M P A T A T W S V L D T L Q A A L A L E H Q V T N R L H G 136  
451 CTGACGCGGTGGCGCGGACCACTGCGGAGATCCGAGATGACGGACTTCTGGAGCAGAGATTCTGGCTGAGCAGATGCACCTGATC 166  
1 L H A L A A D H C R D P Q M T D F L E Q E F L A E Q M H S I 166  
541 GACAAGCTGCGAGCGCTCATCAACGAGCTGCAGAACATGACACCGGCTCGCGGAGTTCTCTTGGATCGGAGCTGCGTCCGGAGAC 196  
1 D K L Q R L I T G T Q L Q N M D T G L G E F L D R E L R R E D 196  
631 AGGACAAATAAACCGCAGGACTCTGCTGCGAGCGGCTCTGGCGGGGGTCTCTGCACTTTCTGGGGGGGTGTGAGGCAAAATG 199  
1 S D K \* 199  
721 CCACCTCGCGCTTCGACACAACCAAGCAATCAATGAACAGTCTCCATCCAAATGCTGATGTTTGGCGGCGGACAAATGTTCCAG 811  
1 CAACCTGTTCCAAAGAATAACATTTCAATTATTATATGCCAACTCTCTCTGTCACAGACCACTTCAATCCGAGATTGAGAGATAGA 901  
1 GATA GAGAGAGAGAGAGAGAGAGAGAGAGAGAGAGAGAGAGAGAGAGAGAGAGAGAGAGAGAGAGAGAGAGAGAGAGAGAGAGAG 981  
1 GAGA GAGAGAGAGAGAGAGAGAGAGAGAGAGAGAGAGAGAGAGAGAGAGAGAGAGAGAGAGAGAGAGAGAGAGAGAGAGAGAGAG 981  
1 GAGTCTAGTGGGTTTGTATGTAATTGCACTAGATCTAGCTGCTGCTGCGAAAGTGGAGGTGAAAGCTGAGCGAGGTGGTGGTGGAGGATA 1081  
1 TGGAGCTGCGGTGGGTGTGTTGAAGTGAAGAAATGCTGGGAATAGTGTAAAGCACTCCACAGAGAGAGATGGTGTGATTAGATATCCAC 1171  
1 ACAGTGTGTCGAGCTGCTGCTTCTGCTCTTCTTCTAGAGAAAGATATAGTCTAGCTGAGGTGGTGCATCTGAGTTAGATGATCTGCTCG 1261  
1 TCTCAGTAATAGTACTGATCTGATTTCTGCTGCTAGTATAGGTGAGGTGAGGTAAATCTCTCGGCTGACAGTTAAAGTCTCTTAGT 1351  
1 GTATTGTTCTAGATGCCACGCAATTGCACTCTCCAGTGTGTTGGGTGTCGGGATCTTAACCTCAACGGGCGAGGCTGCTGCGCGAAGCT 1441  
1 TGGCAAGATCTCGCTGGCGCAATTTGTCCAAATATATCGTAGTGATGATGACAGTGAAGATTAATAATCTGCTGTATCTTTAAAA 1531  
1621 AAAAAA

**Fig. S1.** Complete nucleotide and amino acid sequences of *Haemaphysalis longicornis* ferritin1 (A) and ferritin2 (B). The start and stop codons are underlined by dotted lines. The amino acid residues within the ferroxidase center loop are enclosed in boxes. The 3' UTR ends with a 20-bp polyadenylation tail after the putative polyadenylation signal, AATAAA (double-underlined). For A, the putative iron-responsive element (IRE) in the 5' UTR is underlined, and the predicted glycosylation site is enclosed in a gray-shaded box. For B, the signal peptide is enclosed in a dashed box.

|                            |     |                                     |     |
|----------------------------|-----|-------------------------------------|-----|
| <i>H. longicornis</i> FER1 | 1   | MAAA-----CPRONYHDC                  | 58  |
| <i>H. longicornis</i> FER2 | 1   | MLP-----ILIFAPALLCTPASAGNNLN        | 80  |
| <i>I. ricinus</i> FER1     | 1   | MAAA-----CPRONYHDC                  | 58  |
| <i>I. ricinus</i> FER2     | 1   | MR-----QFVVILALIGMNTSGNNL           | 77  |
| <i>R. sanguineus</i>       | 1   | MAAA-----CPRONYHDC                  | 58  |
| <i>O. moubata</i>          | 1   | MAAA-----CPRONYHDC                  | 58  |
| <i>A. aegypti</i>          | 1   | MMKSVFPGVVAITVAILSLYQETAQAC         | 90  |
| <i>D. melanogaster</i>     | 1   | MYK-----LIASILLAVVAAQAYGDPK         | 85  |
| <i>H. sapiens</i>          | 1   | MTTASIS-----CPRONYHDC               | 61  |
| <i>H. longicornis</i> FER1 | 59  | EEERHAAKLMKYONMRG---GRVYLQFIQ--KFA  | 138 |
| <i>H. longicornis</i> FER2 | 81  | EEERHACKLVVYVNRG---GVSNVNVND--M     | 161 |
| <i>I. ricinus</i> FER1     | 59  | EEERHAACKLMKYONMRG---GRVYLQFIQ--KFA | 138 |
| <i>I. ricinus</i> FER2     | 78  | EEERHACKLVVYVNRG---GVSNVNVND--M     | 158 |
| <i>R. sanguineus</i>       | 59  | EEERHAACKLMKYONMRG---GRVYLQFIQ--KFA | 138 |
| <i>O. moubata</i>          | 59  | EEERHACKLMKYONMRG---GRVYLQFIQ--KFA  | 138 |
| <i>A. aegypti</i>          | 91  | EEERHACKLVVYVNRG---GVSNVNVND--M     | 174 |
| <i>D. melanogaster</i>     | 86  | EEERHACKLVVYVNRG---GVSNVNVND--M     | 171 |
| <i>H. sapiens</i>          | 62  | EEERHACKLVVYVNRG---GVSNVNVND--M     | 141 |
| <i>H. longicornis</i> FER1 | 139 | QWKAKKELSDYVNLKRVG-P--GLGEYMF       | 174 |
| <i>H. longicornis</i> FER2 | 162 | QWHSNDRRLITCLQNMDD--TGLGEYMF        | 199 |
| <i>I. ricinus</i> FER1     | 139 | QWKAKKELSDYVNLKRVG-P--GLGEYMF       | 172 |
| <i>I. ricinus</i> FER2     | 159 | QWNSIDRLRMITVLSNMD---SGGEYLL        | 196 |
| <i>R. sanguineus</i>       | 139 | QWKAKKELSDYVNLKRVG-P--GLGEYMF       | 172 |
| <i>O. moubata</i>          | 139 | QWKAKKELSDYVNLKRVG-P--GLGEYMF       | 172 |
| <i>A. aegypti</i>          | 175 | QWKGORELAEKIATLKKMKKSA              | 209 |
| <i>D. melanogaster</i>     | 172 | QWKGORELAGKLTLKKMDTNGEL             | 205 |
| <i>H. sapiens</i>          | 142 | QWKAKKELSDYVNLKRMGAPES              | 183 |

|                            | <i>H. longicornis</i> FER1 |     | <i>H. longicornis</i> FER2 |     |
|----------------------------|----------------------------|-----|----------------------------|-----|
|                            | Id.                        | Sm. | Id.                        | Sm. |
| <i>H. longicornis</i> FER1 |                            |     | 40                         | 14  |
| <i>H. longicornis</i> FER2 | 40                         | 14  |                            |     |
| <i>I. ricinus</i> FER1     | 84                         | 5   | 36                         | 16  |
| <i>I. ricinus</i> FER2     | 36                         | 15  | 56                         | 20  |
| <i>R. sanguineus</i>       | 94                         | 2   | 38                         | 16  |
| <i>O. moubata</i>          | 87                         | 5   | 37                         | 31  |
| <i>A. aegypti</i>          | 28                         | 19  | 29                         | 22  |
| <i>D. melanogaster</i>     | 30                         | 16  | 31                         | 38  |
| <i>H. sapiens</i>          | 66                         | 12  | 34                         | 21  |

**Fig. S2.** Multiple alignment of the amino acid sequences of *H. longicornis* ferritins with other tick ferritins, human ferritin, and selected invertebrate ferritins. Identical residues are shaded with black, while similar residues are shaded with gray. The percent identity (Id.) and similarity (Sm.) were calculated and are summarized in a table. The GenBank accession numbers for the ferritin sequences are as follows: *H. longicornis* FER1, AY277905; *H. longicornis* FER2, AB734098; *Ixodes ricinus* FER1, AF068224.1; *I. ricinus* FER2, EU885951.1; *Rhipicephalus sanguineus*, AY277907.1; *Ornithodoros moubata*, AF068225.2; *Aedes aegypti*, XM\_001654469.1; *Drosophila melanogaster*, AF145125.1; and *Homo sapiens*, NM\_002032.2.

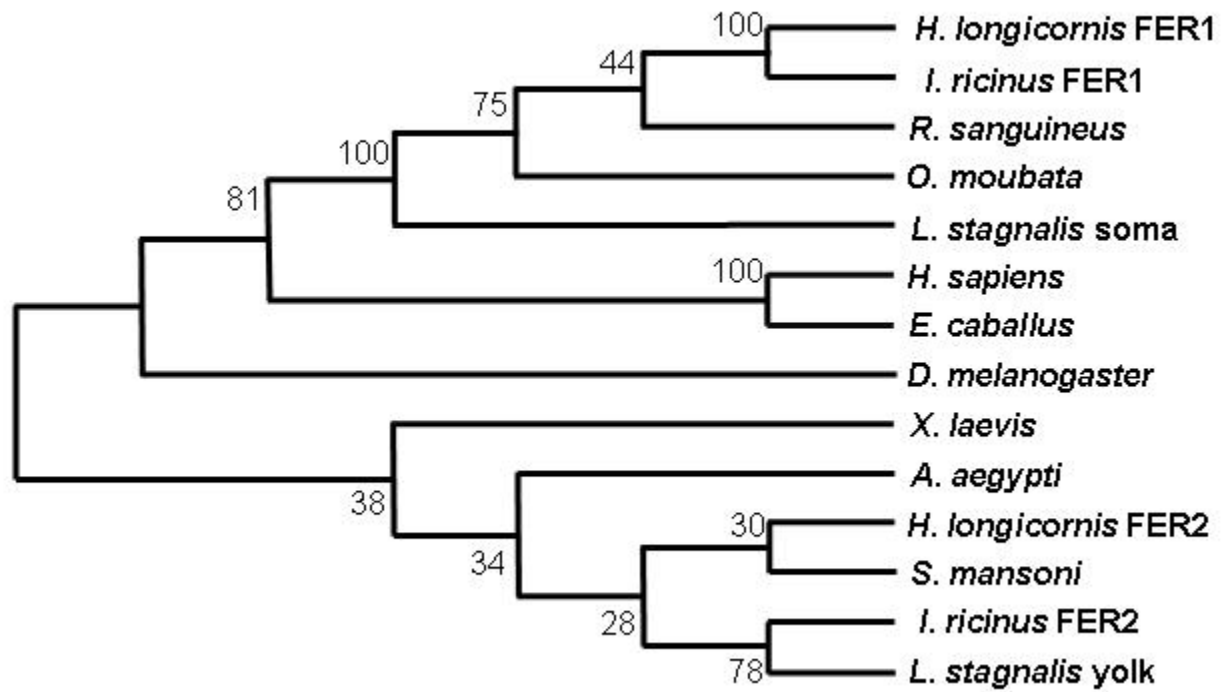

**Fig. S3.** Phylogenetic tree of ferritins from different species of ticks, selected vertebrates and invertebrates. A dendrogram was constructed by the neighbor-joining method based on the amino acid sequences of ferritins. Bootstrap values are shown on the lineage of the tree. GenBank accession numbers are as follows: *H. longicornis* FER1, AY277905; *H. longicornis* FER2, AB734098; *I. ricinus* FER1, AF068224.1; *I. ricinus* FER2, EU885951.1; *R. sanguineus*, AY277907.1; *O. moubata*, AF068225.2; *A. aegypti*, XM\_001654469.1; *D. melanogaster*, AF145125.1; *H. sapiens*, NM\_002032.2; *Equus caballus*, AY112742.1; *Lymnaea stagnalis* yolk ferritin, AY112742.1; *L. stagnalis* soma ferritin, X56778.1; *Schistosoma mansoni*, XM\_002576034.1; and *Xenopus laevis*, NM\_001086111.1.

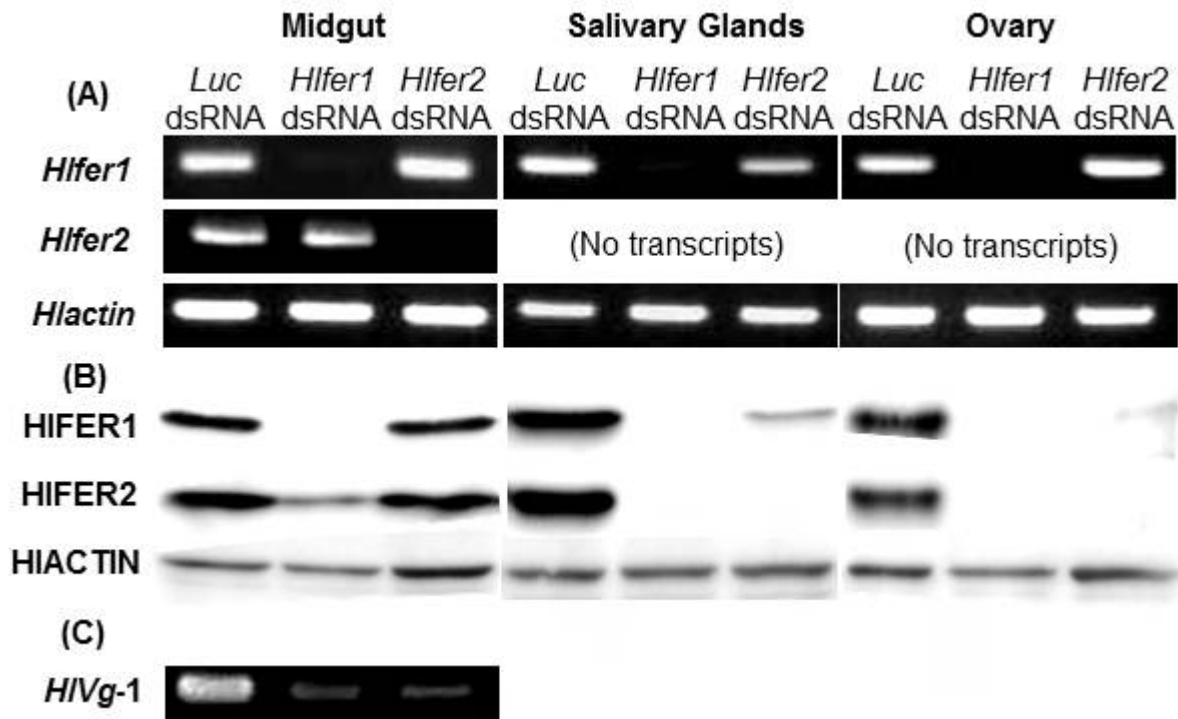

**Fig. S4.** Confirmation of *Hlfer* silencing by RT-PCR (A) and western blot analysis (B) in different organs of adult *H. longicornis*. After injection of *Hlfer1*, *Hlfer2* or *Luciferase* dsRNA, ticks were allowed to feed and were collected at 4 days post-attachment. The midgut, salivary glands and ovary were collected for RNA and protein extraction. Specific primers and anti-sera were used and are indicated on the left. No transcript was detected in the salivary glands and ovary using the *Hlfer2* primer (please refer to Fig. 1). RT-PCR was also performed to examine *HIVg-1* expression in the midgut after *Hlfer* silencing (C).

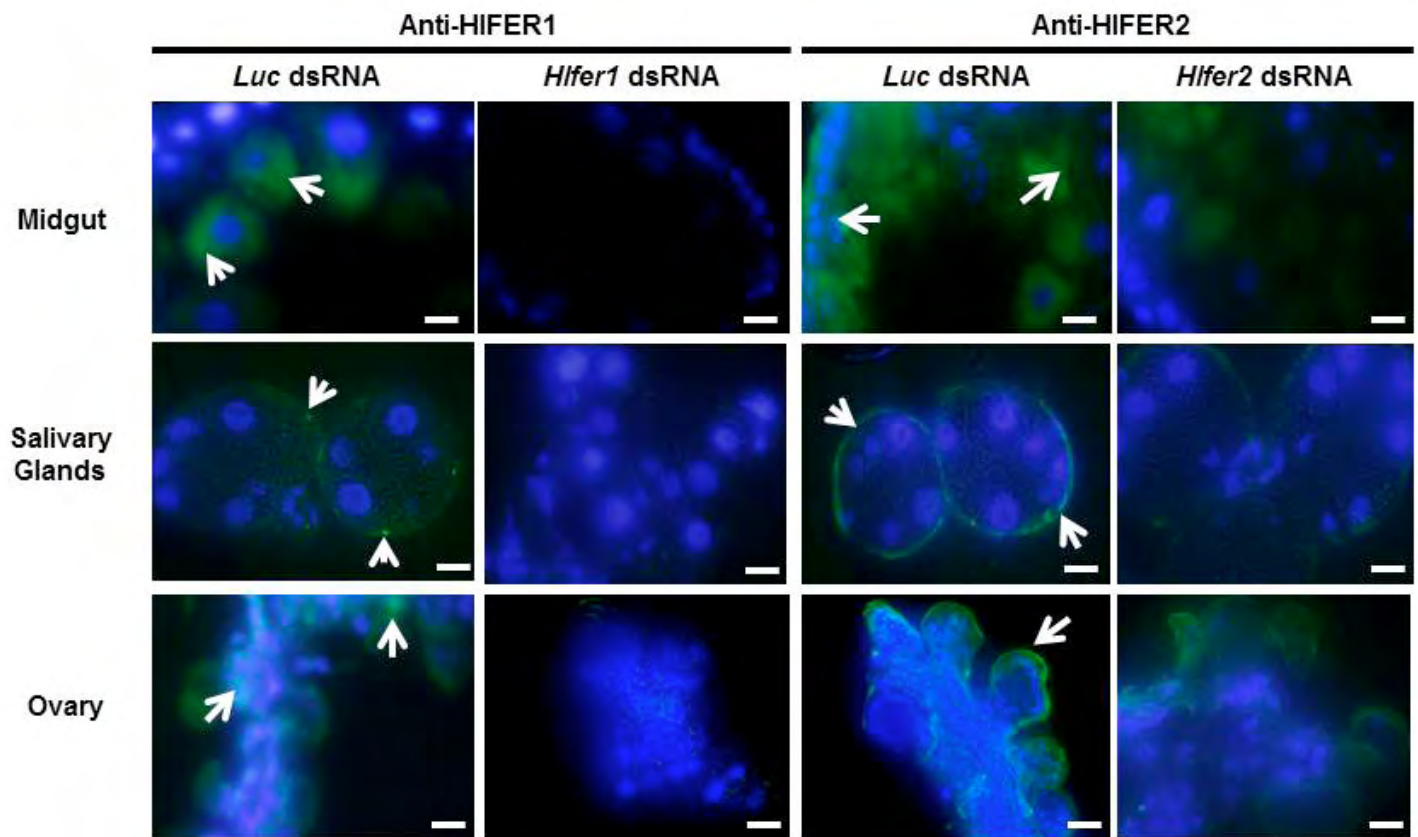

**Fig. S5.** IFAT after *Hlfer* silencing. Midgut, salivary glands and ovary were collected from *Hlfer1*, *Hlfer2* or *Luciferase* dsRNA-injected ticks after 4 days of feeding. Sections were prepared as for IFAT of normal organs (Fig. 7). Arrows point to positive fluorescence. Bars=20  $\mu$ m.

Table S1. Gene-specific primers used for RT-PCR and dsRNA synthesis

| Name                | Sequence (5'→3')                            |
|---------------------|---------------------------------------------|
| Hlfer1 forward      | ATGGCCGCTACTCAACCCCG                        |
| Hlfer1 reverse      | TCAGTCGTCTCCTCCGAGGG                        |
| Hlfer2 forward      | ATGCTCCCGATCCTGATCTT                        |
| Hlfer2 reverse      | TTATTTGTCGCTGTCTTCGC                        |
| Hlfer1 RNAi forward | CTGTACGCGAGCTACGTCTA                        |
| Hlfer1 RNAi reverse | ACACGCTTCAGGTTGGTCA                         |
| Hlfer1 T7 forward   | GGATCCTAATACGACTCACTATAGGCTGTACGCGAGCTACGT  |
| Hlfer1 T7 reverse   | GGATCCTAATACGACTCACTATAGGACACGCTTCAGGTTGGT  |
| Hlfer2 RNAi forward | CAAGTATTTCTGCACGACC                         |
| Hlfer2 RNAi reverse | GAGCCGCTGCAGCTTGTCGA                        |
| Hlfer2 T7 forward   | GGATCCTAATACGACTCACTATAGGCAAGTATTTCTGCACG   |
| Hlfer2 T7 reverse   | GGATCCTAATACGACTCACTATAGGGAGCCGCTGCAGCTTGT  |
| Luc T7 forward      | GTAATACGACTCACTATAGGGCTTCCATCTTCCAGGGATACG  |
| Luc T7 reverse      | GTAATACGACTCACTATAGGCGTCCACAAACACAACCTCCTCC |
